# Supplementary material for: Moxibustion for the treatment of diabetic peripheral neuropathy: A systematic review and meta-analysis following PRISMA guidelines
Source: PubMed Central journal article supplement (PMC7523832; doi:10.1097/md.0000000000022286), 2020-09-25
Supplement: medi-99-e22286-s001.pdf [file medi-99-e22286-s001.pdf]

# **Moxibustion for the treatment of diabetic peripheral neuropathy: a systematic review and meta-analysis following PRISMA guidelines**

Relevant studies will be obtained from eight electronic databases, including Cochrane Library, PubMed, EMBASE, Web of Science, Chinese National Knowledge Infrastructure database (CNKI), Chinese Biomedical Database (CBM), Chinese Science and Technique Journal Database (VIP), and Wan Fang Database. The search will be performed in English and Chinese.

## **Search Strategy for PubMed**

- #1 diabetic neuropathy[mh]
- #2 diabetic peripheral neuropathy[all fields]
- #3 diabetic neuropathies[all fields]
- #4 DPN [all fields]
- #5 #1 OR #2 OR #3 OR #4
- #6 moxibustion[mh]
- #7 moxa[all fields]
- #8 moxa-moxibustion[all fields]
- #9 warm-moxibustion[all fields]
- #10 mild-moxibustion[all fields]
- #11 indirect-moxibustion[all fields]
- #12 #6 OR #7 OR #8 OR #9 OR #10 OR #11
- #13 #5 AND #12
- #14 randomized controlled trial[pt]
- #15 controlled clinical trial[pt]
- #16 randomized[tiab]
- #17 placebo[tiab]
- #18 randomly[tiab]
- #19 #14 OR #15 OR #16 OR #17 OR #18
- #20 #13 AND #19
